# Supplementary material for: Energetic stability and photocatalytic activity of SrTiO3 nanowires: ab initio simulations
Source: Royal Society of Chemistry journal article supplement (doi:10.1039/c5ra00306g), 2015-01-01
Supplement: c5ra00306g1.pdf [file c5ra00306g1.pdf]

## Supplementary Information

### Energetic stability and photocatalytic activity of SrTiO<sub>3</sub> nanowires: *Ab initio* simulations

Andrei V. Bandura<sup>1</sup>, Robert A. Evarestov<sup>1</sup> and Yuri F. Zhukovskii<sup>2,\*</sup>

The band structures of both non-stoichiometric and stoichiometric SrTiO<sub>3</sub> nanowires in the vicinity of the energy gaps  $\Delta\varepsilon_{\text{gap}}$  between the tops of the valence band (VB) and the bottoms of the conduction band (CB) or the Fermi levels ( $E_F$ ) have been calculated using the hybrid DFT-LCAO *PBE0* method within the formalism of the localized atomic orbitals [1]. The band structures of non-stoichiometric 4×4 STO NWs with SrO and TiO<sub>2</sub> terminations are shown in Figs. S11a,b, respectively. In both cases, the bottoms of the CBs are crossed by the Fermi levels.

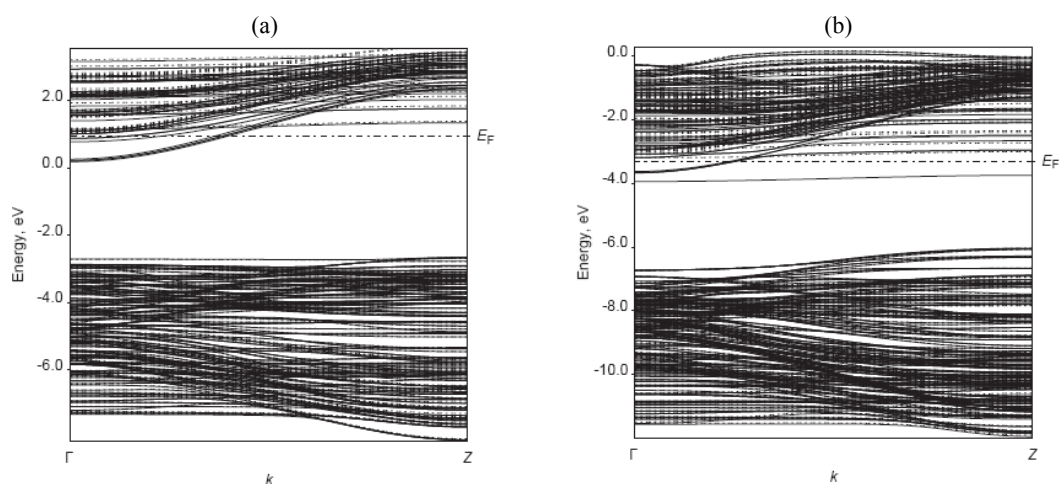

Figure S11. Electronic band structure of non-stoichiometric 4×4 SrTiO<sub>3</sub> nanowires along the  $k$  vector with overall symmetric: (a) SrO-termination and (b) TiO<sub>2</sub>-termination.

Obviously, the band structures of non-stoichiometric NWs obtained in the current study can be described as non-direct since the CB bottom is achieved at  $\Gamma$  point of the BZ, whereas the VB top corresponds to  $Z$  point for both terminations, analogously to Ref. [2].

Analogously to both types of non-stoichiometric nanowires, the band gaps of stoichiometric nanowires (Fig. S12) remain non-direct since the CB bottom is achieved at  $\Gamma$  point of the Brillouin zone (BZ), whereas the VB top corresponds to  $Z$  point. Values of  $\Delta\varepsilon_{\text{gap}}$  are noticeably smaller than those for TiO<sub>2</sub>-terminated SrTiO<sub>3</sub> nanowires and markedly smaller as compared to SrO-terminated STO NWs when comparing those for similar values of  $d_{\text{NW}}$ :

$$\Delta\varepsilon_{\text{gap}}^{\text{stoichiometric}} < \Delta\varepsilon_{\text{gap}}^{\text{TiO}_2\text{-non-stoichiometric}} < \Delta\varepsilon_{\text{gap}}^{\text{SrO-non-stoichiometric}}.$$

The widths of band gaps of both non-stoichiometric and stoichiometric STO nanowires consequently decrease with growing values of  $d_{\text{NW}}$  for the same NW morphology.

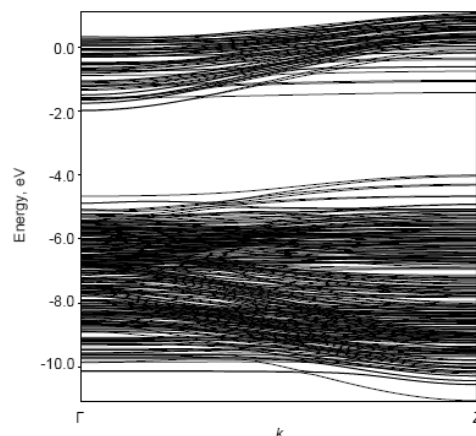

Figure S12. The electronic band structure of stoichiometric 5×5 SrTiO<sub>3</sub> nanowire along the  $k$  vector.

[1] C. Adamo and V. Barone, *J. Chem. Phys.* **110**, 6158 (1999).

[2] Q. Fu, T. He, J.L. Li, and G.W. Yang, *J. Appl. Phys.* **112**, 104322 (2012).

<sup>1</sup> St. Petersburg State University, Chemistry Faculty, Petrodvorets (St. Petersburg), Russian Federation

<sup>2</sup> Institute of Solid State Physics, University of Latvia, Riga, Latvia

\* Corresponding author <quantzh@latnet.lv>
